# Supplementary material for: Density‐weighted concentric circle trajectories for high resolution brain magnetic resonance spectroscopic imaging at 7T
Source: PubMed Central journal article supplement (PMC5873433; doi:10.1002/mrm.26987), 2017-11-06
Supplement: MRM-79-2874-s001.pdf [file MRM-79-2874-s001.pdf]

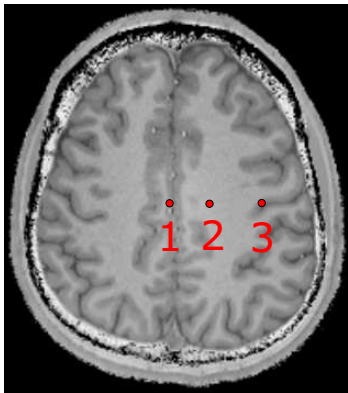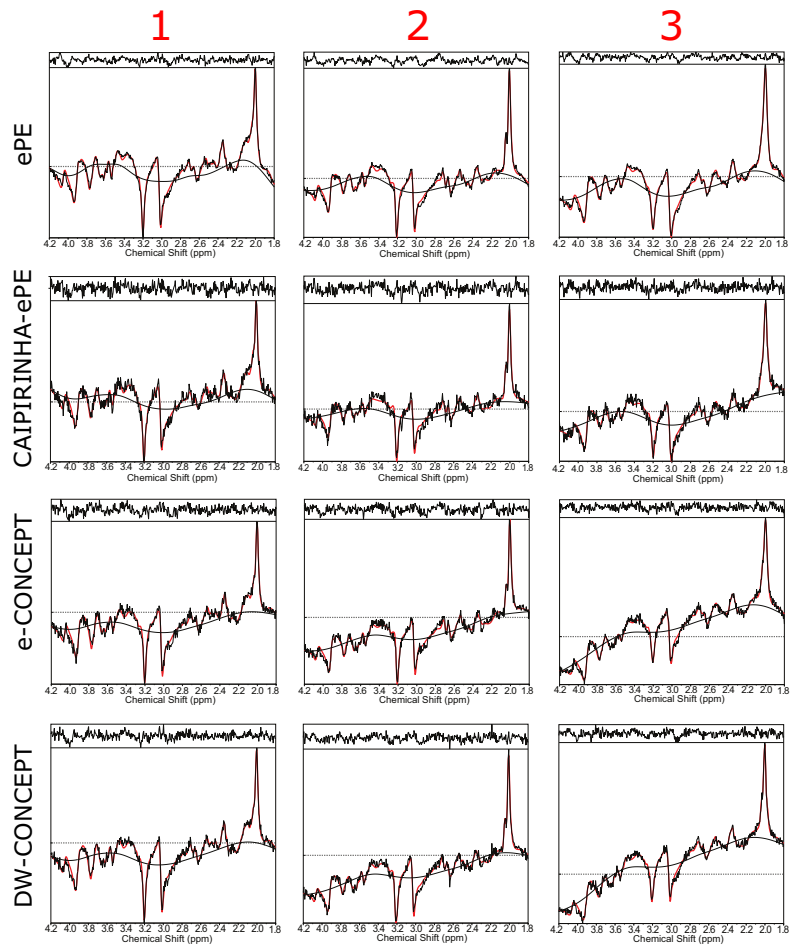

Supporting Figure S1

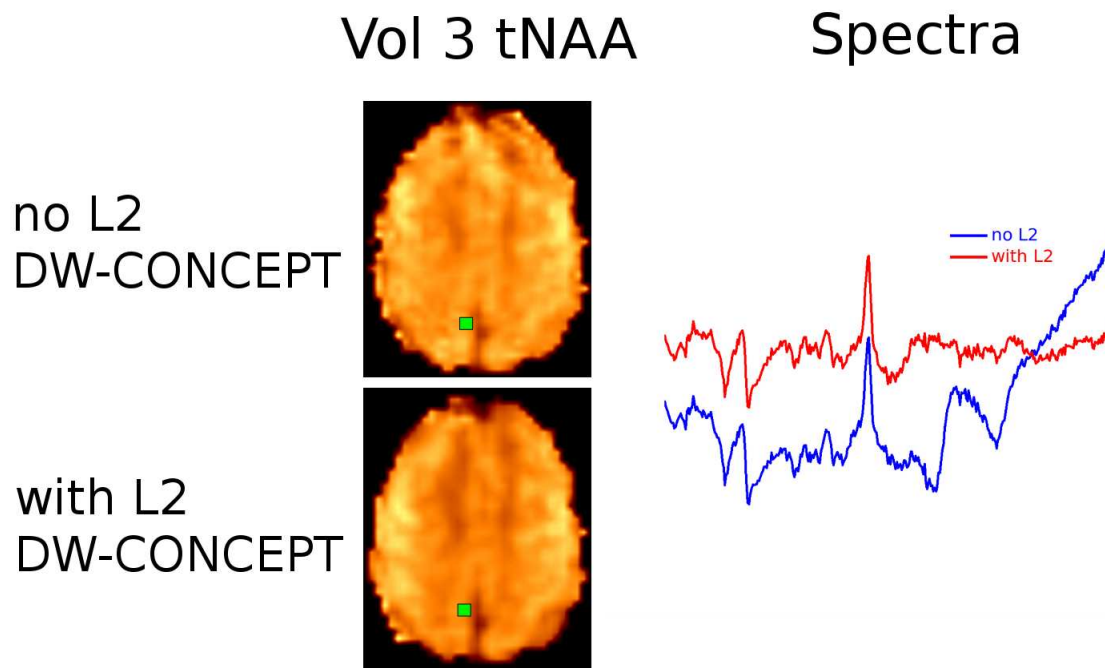

Supporting Figure S2

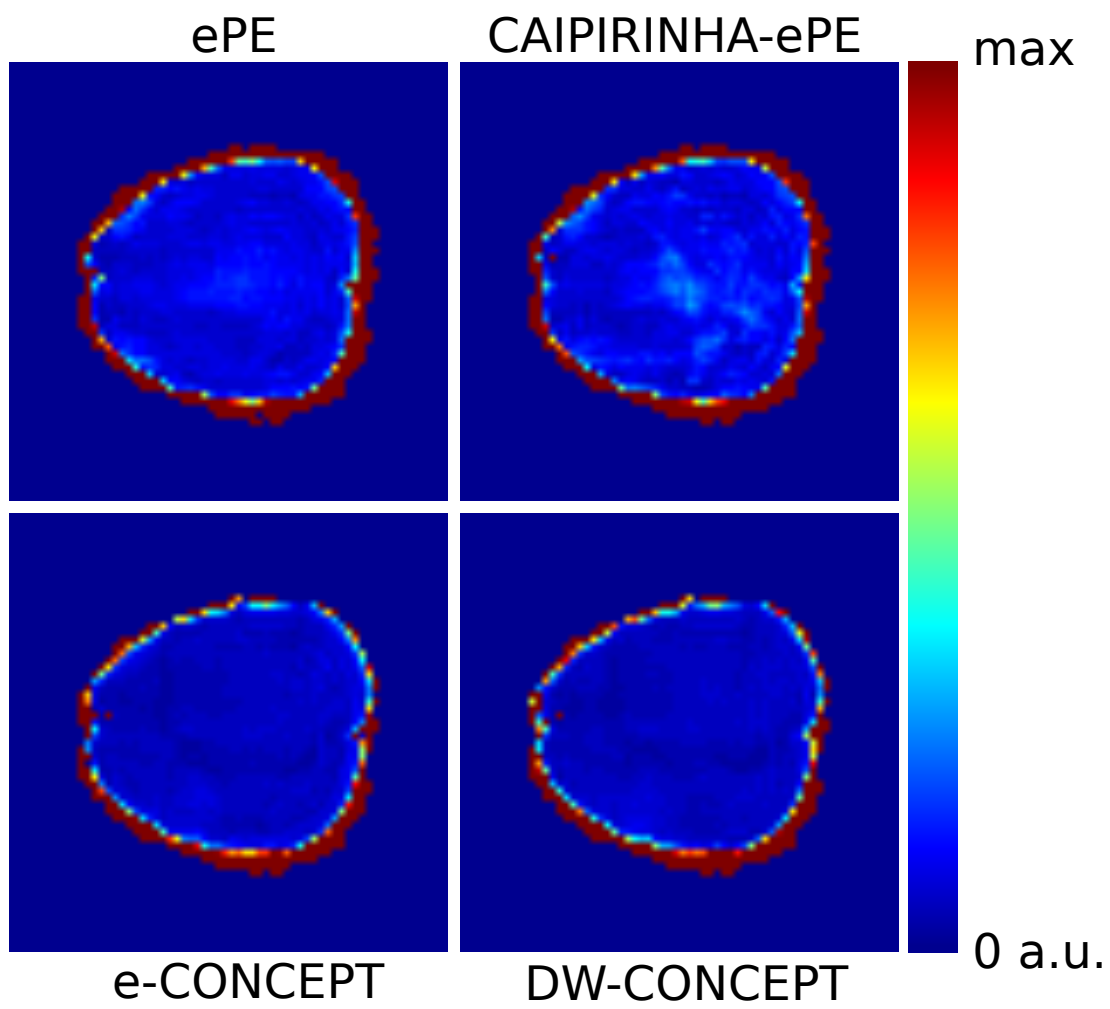

Supporting Figure S3
